# Supplementary material for: Enzymes with Lactonase Activity against Fungal Quorum Molecules as Effective Antifungals
Source: MDPI journal article supplement (doi:10.3390/biom14030383), 2024-03-21
Supplement: s1 [file s1]

# Supplementary Materials

## Biomolecules

### Enzymes exhibiting lactonase activity against fungal QS molecules as effective antifungals

Elena Efremenko\*, Aysel Aslanli, Maksim Domnin, Nikolay Stepanov and Olga Senko

Faculty of Chemistry, Lomonosov Moscow State University, Lenin Hills 1/3, Moscow 119991, Russia

\*Correspondence: elena\_efremenko@list.ru; Tel.: +7-(495)-939-3170

**TableS1.** Values of affinity and area occupied by lactone containing signaling molecules of fungal QS on the surface of enzymes, exhibiting lactonase activity.

| Enzyme                | Quorum molecule         | Occupied area, %  |       | Affinity, $\text{kJ}\cdot\text{mol}^{-1}$ |
|-----------------------|-------------------------|-------------------|-------|-------------------------------------------|
|                       |                         | Near active sites | Total |                                           |
| AaL                   | $\gamma$ -butyrolactone | 40.6              | 4.5   | $-14.6 \pm 0.8$                           |
|                       | $\gamma$ -heptalactone  | 61.2              | 4.6   | $-20.3 \pm 1.4$                           |
|                       | Butyrolactone I         | 68.6              | 5.2   | $-31.6 \pm 1.2$                           |
|                       | Multicolanic acid       | 72.5              | 3.6   | $-24.1 \pm 0.7$                           |
|                       | Multicolic acid         | 61.0              | 8.3   | $-23.0 \pm 0.9$                           |
|                       | Multicolosic acid       | 68.3              | 5.9   | $-23.6 \pm 2.1$                           |
| AidC                  | $\gamma$ -butyrolactone | 59.2              | 2     | $-15.5 \pm 0.7$                           |
|                       | $\gamma$ -heptalactone  | 0                 | 2.9   | $-19.7 \pm 0.4$                           |
|                       | Butyrolactone I         | 35.4              | 7.5   | $-34.5 \pm 3.2$                           |
|                       | Multicolanic acid       | 0                 | 3.7   | $-24.1 \pm 1.0$                           |
|                       | Multicolic acid         | 34.4              | 3.5   | $-26.8 \pm 0.1$                           |
|                       | Multicolosic acid       | 0                 | 4.0   | $-27.0 \pm 1.7$                           |
| AiiA                  | $\gamma$ -butyrolactone | 42.1              | 5.2   | $-13.2 \pm 1.1$                           |
|                       | $\gamma$ -heptalactone  | 41.7              | 6.9   | $-17.8 \pm 0.8$                           |
|                       | Butyrolactone I         | 4.0               | 13.3  | $-28.2 \pm 2.3$                           |
|                       | Multicolanic acid       | 7.3               | 7.0   | $-21.8 \pm 1.6$                           |
|                       | Multicolic acid         | 4.0               | 6.5   | $-20.9 \pm 1.4$                           |
|                       | Multicolosic acid       | 7.3               | 4.9   | $-20.7 \pm 1.5$                           |
| AiiB                  | $\gamma$ -butyrolactone | 1.1               | 1.6   | $-15.9 \pm 0.8$                           |
|                       | $\gamma$ -heptalactone  | 4.5               | 2.1   | $-19.5 \pm 1.1$                           |
|                       | Butyrolactone I         | 4.5               | 3.2   | $-36.4 \pm 1.4$                           |
|                       | Multicolanic acid       | 18.6              | 5.1   | $-23.4 \pm 1.1$                           |
|                       | Multicolic acid         | 0                 | 2.3   | $-28.7 \pm 1.0$                           |
|                       | Multicolosic acid       | 16.1              | 5.1   | $-23.4 \pm 1.4$                           |
| His <sub>6</sub> -OPH | $\gamma$ -butyrolactone | 77.0              | 2.2   | $-16.7 \pm 0.4$                           |
|                       | $\gamma$ -heptalactone  | 42.4              | 1.8   | $-21.7 \pm 1$                             |

|        |                   |      |      |             |
|--------|-------------------|------|------|-------------|
|        | Butyrolactone I   | 15.2 | 6.9  | -31.8 ± 1.6 |
|        | Multicolanic acid | 7.2  | 5.4  | -23.6 ± 1.2 |
|        | Multicolic acid   | 14.1 | 5    | -22.2 ± 0.9 |
|        | Multicolosic acid | 11.5 | 5.6  | -23.4 ± 0.9 |
| ZEN    | γ-butyrolactone   | 83.8 | 2.3  | -15.1 ± 0.7 |
|        | γ-heptalactone    | 97.7 | 3.5  | -18 ± 2.3   |
|        | Butyrolactone I   | 0    | 14.3 | -26.6 ± 1.1 |
|        | Multicolanic acid | 97.7 | 6.6  | -22.6 ± 2.3 |
|        | Multicolic acid   | 97.7 | 7.6  | -22.6 ± 2   |
|        | Multicolosic acid | 94.0 | 10.4 | -19.9 ± 1.5 |
| SsoPox | γ-butyrolactone   | 50.4 | 2.6  | -16.3 ± 0.9 |
|        | γ-heptalactone    | 52.4 | 4.7  | -21.5 ± 0.7 |
|        | Butyrolactone I   | 12.6 | 8.7  | -34.3 ± 5.1 |
|        | Multicolanic acid | 0    | 2.1  | -27.8 ± 0.7 |
|        | Multicolic acid   | 27.5 | 3.2  | -26.8 ± 0.9 |
|        | Multicolosic acid | 20.8 | 2.7  | -25.9 ± 1.3 |
| PvdQ   | γ-butyrolactone   | 14.1 | 2.2  | -16.7 ± 1   |
|        | γ-heptalactone    | 35.9 | 3.3  | -19 ± 1.2   |
|        | Butyrolactone I   | 94.5 | 5.1  | -31.0 ± 0.7 |
|        | Multicolanic acid | 57.1 | 4.4  | -22.6 ± 0.4 |
|        | Multicolic acid   | 67.9 | 4.7  | -24.1 ± 3.0 |
|        | Multicolosic acid | 82.0 | 3.5  | -19.5 ± 1.1 |
| MiM-1  | γ-butyrolactone   | 77.5 | 8.2  | -13.6 ± 0.8 |
|        | γ-heptalactone    | 76.7 | 10.9 | -15.9 ± 0.9 |
|        | Butyrolactone I   | 94.7 | 16.1 | -27 ± 0.7   |
|        | Multicolanic acid | 87.5 | 14.7 | -19.7 ± 1.1 |
|        | Multicolic acid   | 91.8 | 16.2 | -20.7 ± 1.1 |
|        | Multicolosic acid | 91.9 | 17.9 | -18.4 ± 0.7 |
| MIM-2  | γ-butyrolactone   | 16.1 | 4.1  | -13.8 ± 0.3 |
|        | γ-heptalactone    | 66.1 | 3.7  | -16.5 ± 1.4 |
|        | Butyrolactone I   | 53.1 | 7.6  | -29.5 ± 1.1 |
|        | Multicolanic acid | 90.4 | 8.1  | -21.3 ± 1.1 |
|        | Multicolic acid   | 84.0 | 7.9  | -21.1 ± 1   |
|        | Multicolosic acid | 80.7 | 10.3 | -19.7 ± 1.4 |
| NDM-1  | γ-butyrolactone   | 0    | 1.8  | -16.7 ± 1.1 |
|        | γ-heptalactone    | 10   | 3.1  | -24.3 ± 2.9 |
|        | Butyrolactone I   | 54.6 | 7.1  | -28 ± 0.7   |
|        | Multicolanic acid | 61.4 | 4.9  | -22.5 ± 3.1 |
|        | Multicolic acid   | 56.9 | 7.8  | -21.7 ± 0.6 |
|        | Multicolosic acid | 24.7 | 6.5  | -19.7 ± 0.2 |

**Table S2.** Theoretically calculated  $K_m$  values for His<sub>6</sub>-OPH in the reactions of hydrolysis of lactone containing signaling molecules of fungal QS.

| Quorum molecule   | $K_m$ , $\mu$ M |
|-------------------|-----------------|
| γ-butyrolactone   | 1018.6          |
| γ-heptalactone    | 315.8           |
| Butyrolactone I   | 29.6            |
| Multicolanic acid | 202.4           |
| Multicolic acid   | 280.9           |
| Multicolosic acid | 212.1           |

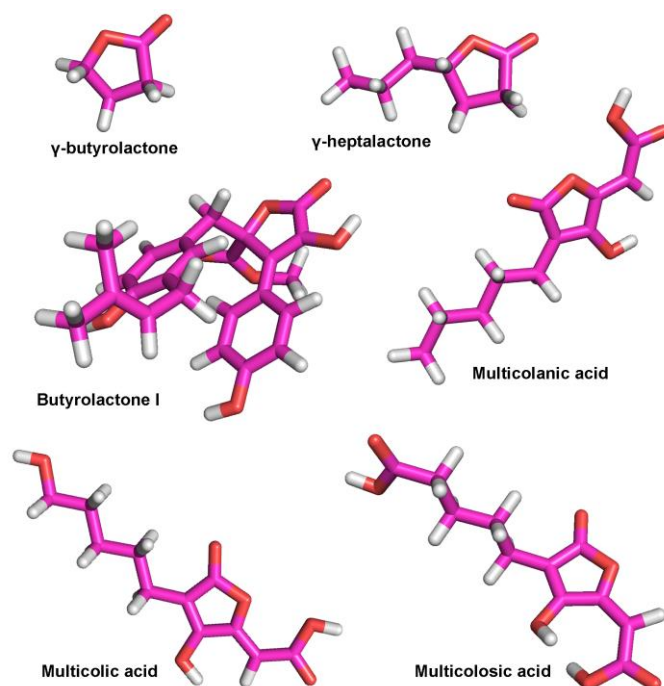

**Figure S1.** Three-dimensional structure of lactone-containing molecules of fungal QS used in molecular docking simulations.

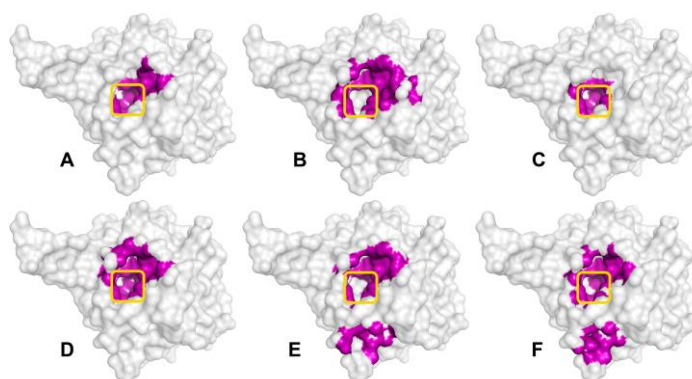

**Figure S2.** Localization of signaling molecules of fungal QS ( $\gamma$ -butyrolactone (A), butyrolactone I (B),  $\gamma$ -heptalactone (C), multicolanic acid (D), multicolalic acid (E) and multicolosic acid (F)) on the surface of **AaL** enzyme, exhibiting lactonase activity. Molecular surface of enzymes, shown as translucent, colored gray. The atoms located within 4 Å of any QS molecule atom and the corresponding molecular surface of enzyme are colored purple. The entrances to the active sites of enzymes are highlighted with yellow boxes.

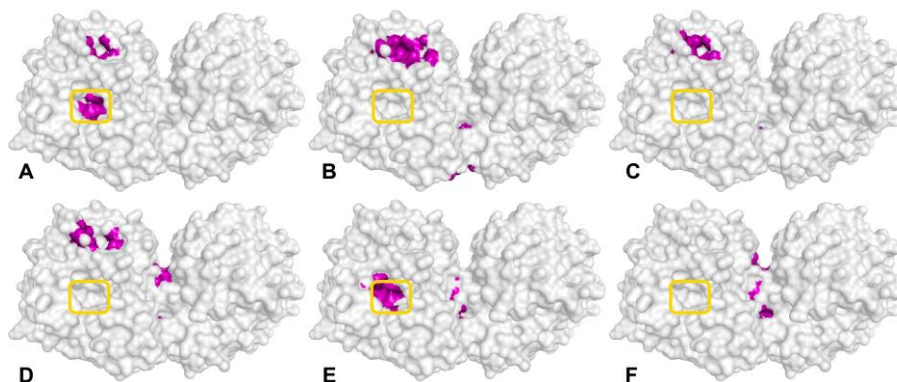

**Figure S3.** Localization of signaling molecules of fungal QS ( $\gamma$ -butyrolactone (A), butyrolactone I (B),  $\gamma$ -heptalactone (C), multicolanic acid (D), multicolic acid (E) and multicolosic acid (E)) on the surface of **AidC** enzyme, exhibiting lactonase activity. Molecular surface of enzymes shown as translucent colored gray. The atoms located within 4 Å of any QS molecule atom and the corresponding molecular surface of enzyme, are colored purple. The entrances to the active sites of enzymes are highlighted with yellow boxes.

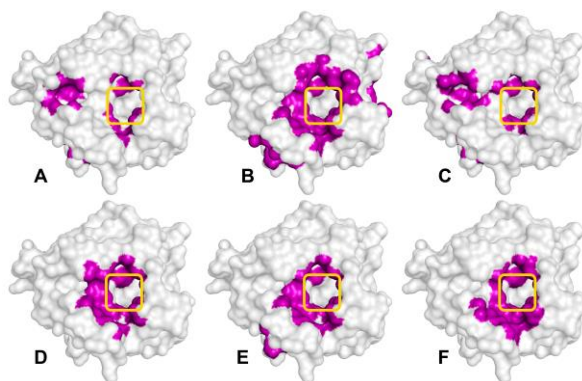

**Figure S4.** Localization of signaling molecules of fungal QS ( $\gamma$ -butyrolactone (A), butyrolactone I (B),  $\gamma$ -heptalactone (C), multicolanic acid (D), multicolic acid (E) and multicolosic acid (E)) on the surface of **AiiA** enzyme, exhibiting lactonase activity. Molecular surface of enzymes shown as translucent colored gray. The atoms located within 4 Å of any QS molecule atom and the corresponding molecular surface of enzyme, are colored purple. The entrances to the active sites of enzymes are highlighted with yellow boxes.

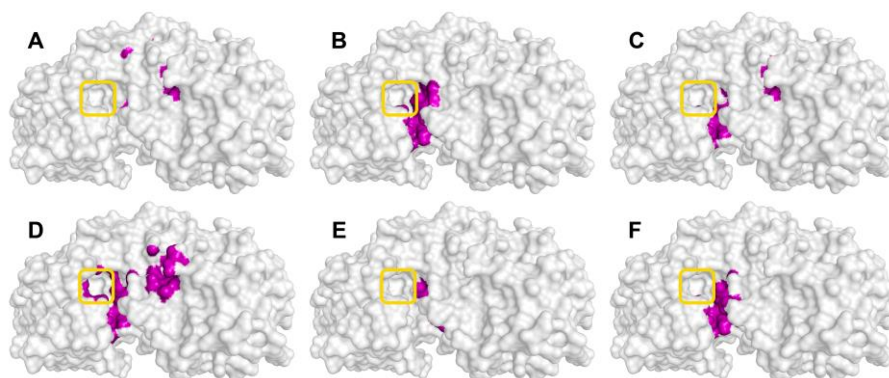

**Figure S5.** Localization of signaling molecules of fungal QS ( $\gamma$ -butyrolactone (A), butyrolactone I (B),  $\gamma$ -heptalactone (C), multicolanic acid (D), multicolic acid (E) and multicolosic acid (E)) on the surface of **AiiB** enzyme, exhibiting lactonase activity. Molecular surface of enzymes shown as translucent colored gray. The atoms located within 4 Å of any QS molecule atom and the corresponding molecular surface of enzyme, are colored purple. The entrances to the active sites of enzymes are highlighted with yellow boxes.

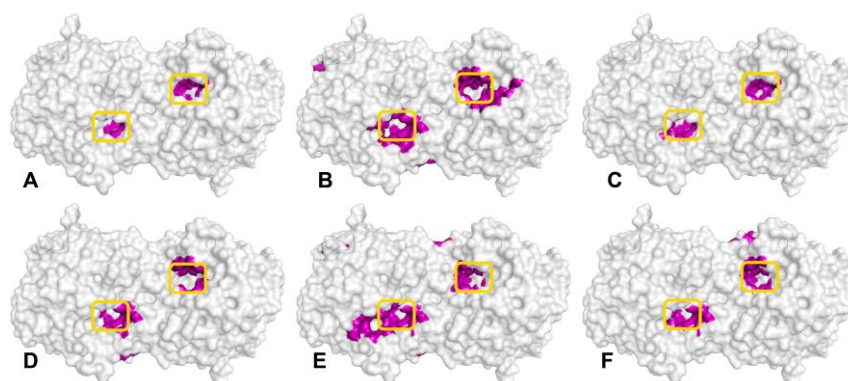

**Figure S6.** Localization of signaling molecules of fungal QS ( $\gamma$ -butyrolactone (A), butyrolactone I (B),  $\gamma$ -heptalactone (C), multicolanic acid (D), multicollic acid (E) and multicolosic acid (E)) on the surface of **His6-OPH** enzyme, exhibiting lactonase activity. Molecular surface of enzymes shown as translucent colored gray. The atoms located within 4 Å of any QS molecule atom and the corresponding molecular surface of enzyme, are colored purple. The entrances to the active sites of enzymes are highlighted with yellow boxes.

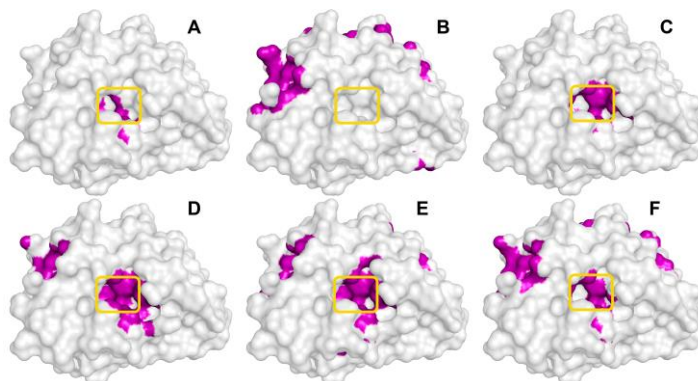

**Figure S7.** Localization of signaling molecules of fungal QS ( $\gamma$ -butyrolactone (A), butyrolactone I (B),  $\gamma$ -heptalactone (C), multicolanic acid (D), multicollic acid (E) and multicolosic acid (E)) on the surface of **ZEN** enzyme, exhibiting lactonase activity. Molecular surface of enzymes shown as translucent colored gray. The atoms located within 4 Å of any QS molecule atom and the corresponding molecular surface of enzyme, are colored purple. The entrances to the active sites of enzymes are highlighted with yellow boxes.

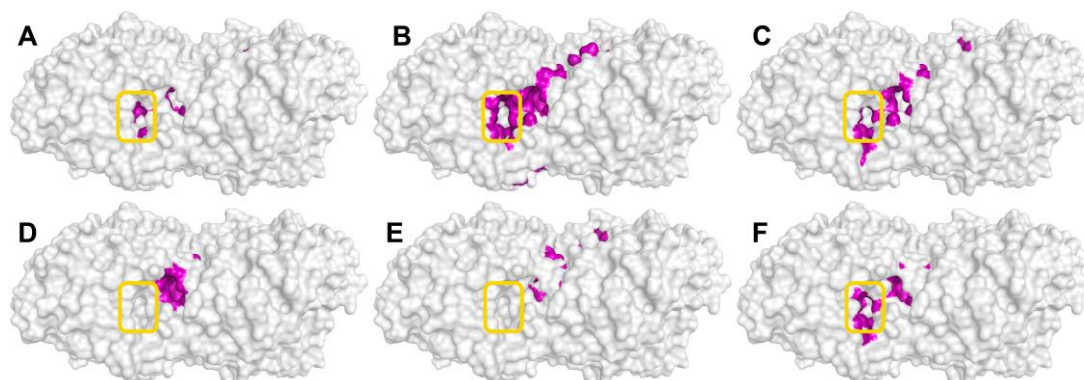

**Figure S8.** Localization of signaling molecules of fungal QS ( $\gamma$ -butyrolactone (A), butyrolactone I (B),  $\gamma$ -heptalactone (C), multicolanic acid (D), multicollic acid (E) and multicolosic acid (E)) on the surface of **SsoPox** enzyme, exhibiting lactonase activity. Molecular surface of enzymes shown as translucent colored gray. The atoms located within 4 Å of any QS molecule atom and the corresponding molecular surface of enzyme, are colored purple. The entrances to the active sites of enzymes are highlighted with yellow boxes.

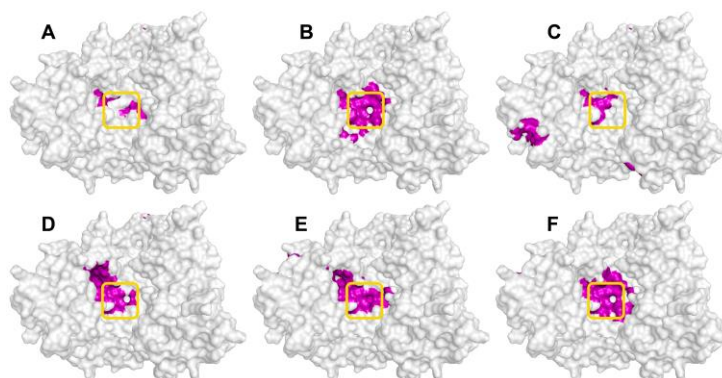



**Figure S9.** Localization of signaling molecules of fungal QS ( $\gamma$ -butyrolactone (A), butyrolactone I (B),  $\gamma$ -heptalactone (C), multicolanic acid (D), multicollic acid (E) and multicolosic acid (E)) on the surface of **PvdQ** enzyme, exhibiting lactonase activity. Molecular surface of enzymes shown as translucent colored gray. The atoms located within 4 Å of any QS molecule atom and the corresponding molecular surface of enzyme, are colored purple. The entrances to the active sites of enzymes are highlighted with yellow boxes.

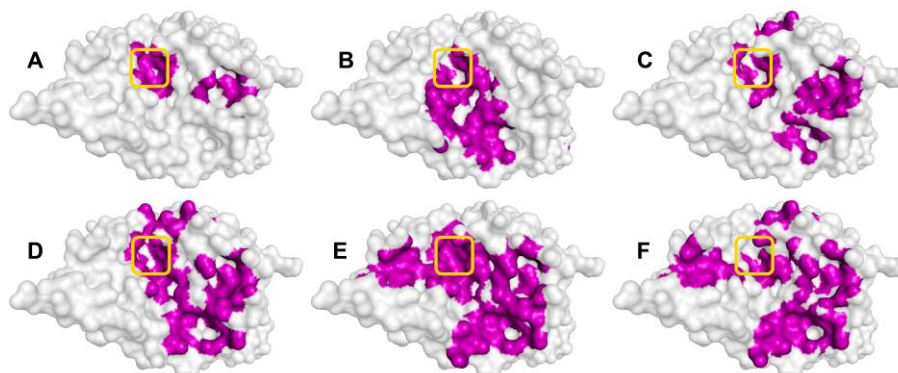

**Figure S10.** Localization of signaling molecules of fungal QS ( $\gamma$ -butyrolactone (A), butyrolactone I (B),  $\gamma$ -heptalactone (C), multicolanic acid (D), multicollic acid (E) and multicolosic acid (E)) on the surface of **MiM1** enzyme, exhibiting lactonase activity. Molecular surface of enzymes shown as translucent colored gray. The atoms located within 4 Å of any QS molecule atom and the corresponding molecular surface of enzyme, are colored purple. The entrances to the active sites of enzymes are highlighted with yellow boxes.

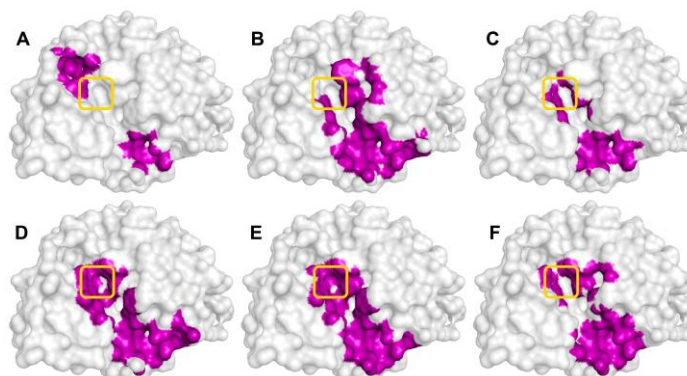

**Figure S11.** Localization of signaling molecules of fungal QS ( $\gamma$ -butyrolactone (A), butyrolactone I (B),  $\gamma$ -heptalactone (C), multicolanic acid (D), multicollic acid (E) and multicolosic acid (E)) on the surface of **MiM2** enzyme, exhibiting lactonase activity. Molecular surface of enzymes shown as translucent colored gray. The atoms located within 4 Å of any QS molecule atom and the corresponding molecular surface of enzyme, are colored purple. The entrances to the active sites of enzymes are highlighted with yellow boxes.

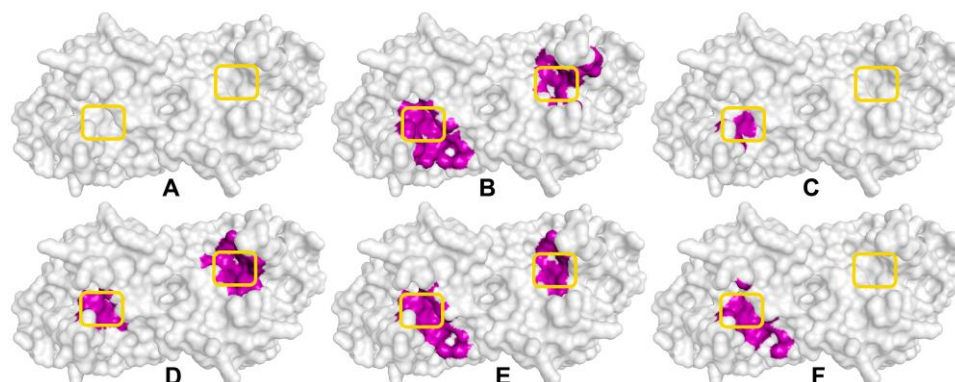

**Figure S12.** Localization of signaling molecules of fungal QS ( $\gamma$ -butyrolactone (A), butyrolactone I (B),  $\gamma$ -heptalactone (C), multicolanic acid (D), multicolinic acid (E) and multicolosic acid (E)) on the surface of **NDM-1** enzyme, exhibiting lactonase activity. Molecular surface of enzymes shown as translucent colored gray. The atoms located within 4 Å of any QS molecule atom and the corresponding molecular surface of enzyme, are colored purple. The entrances to the active sites of enzymes are highlighted with yellow boxes.

**A**

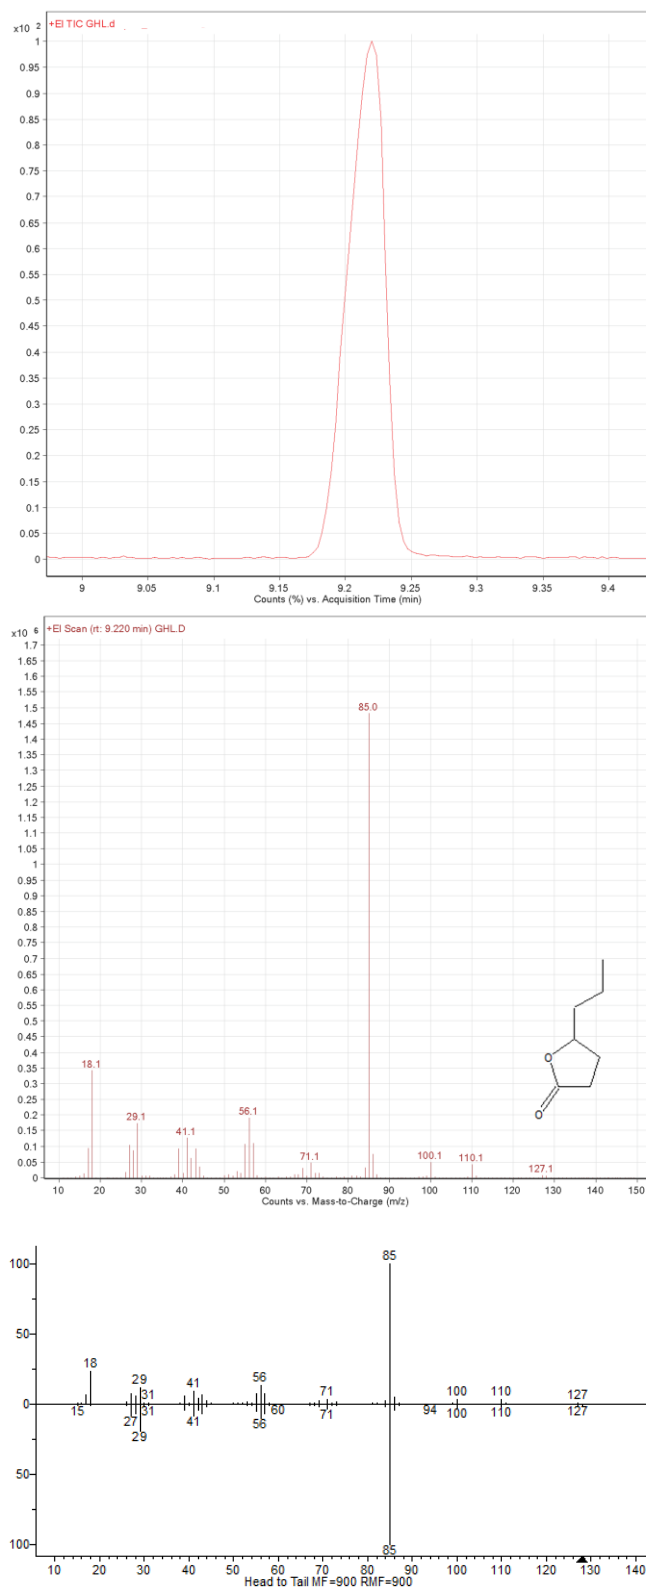

B

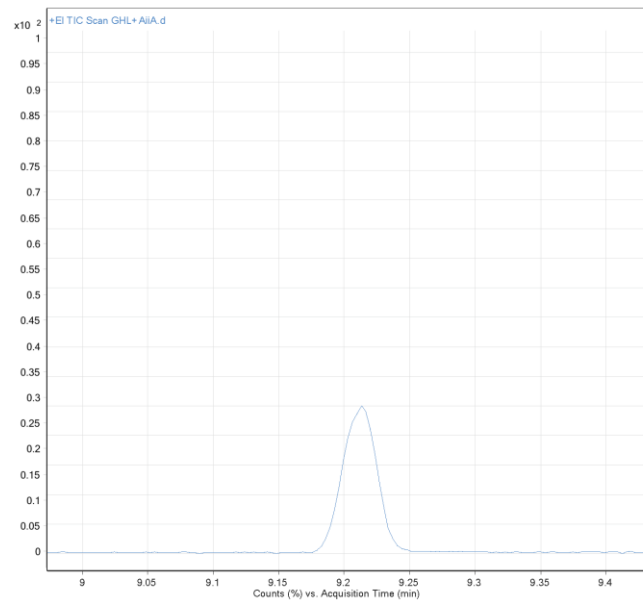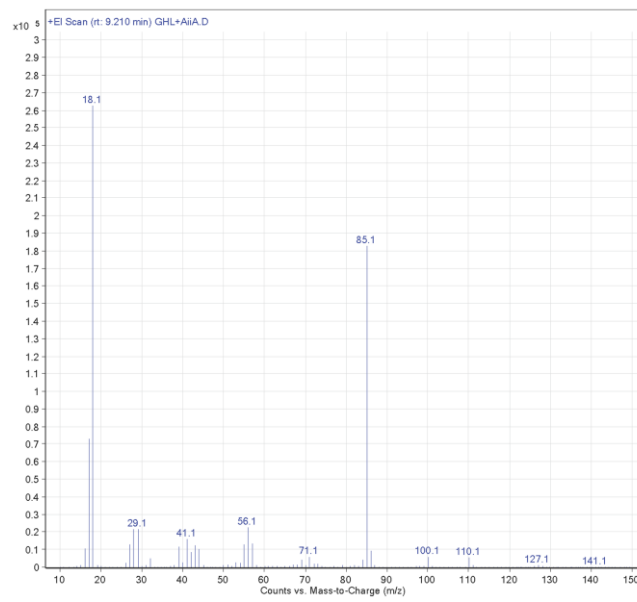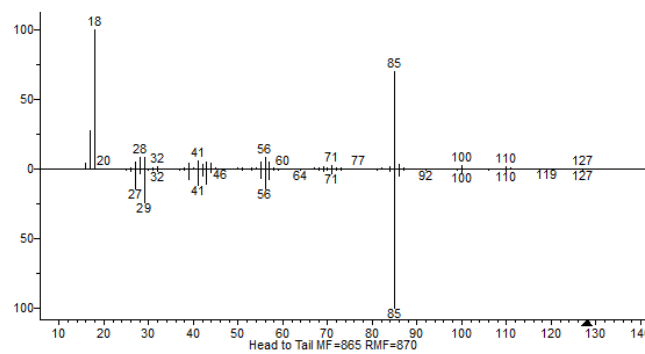



C

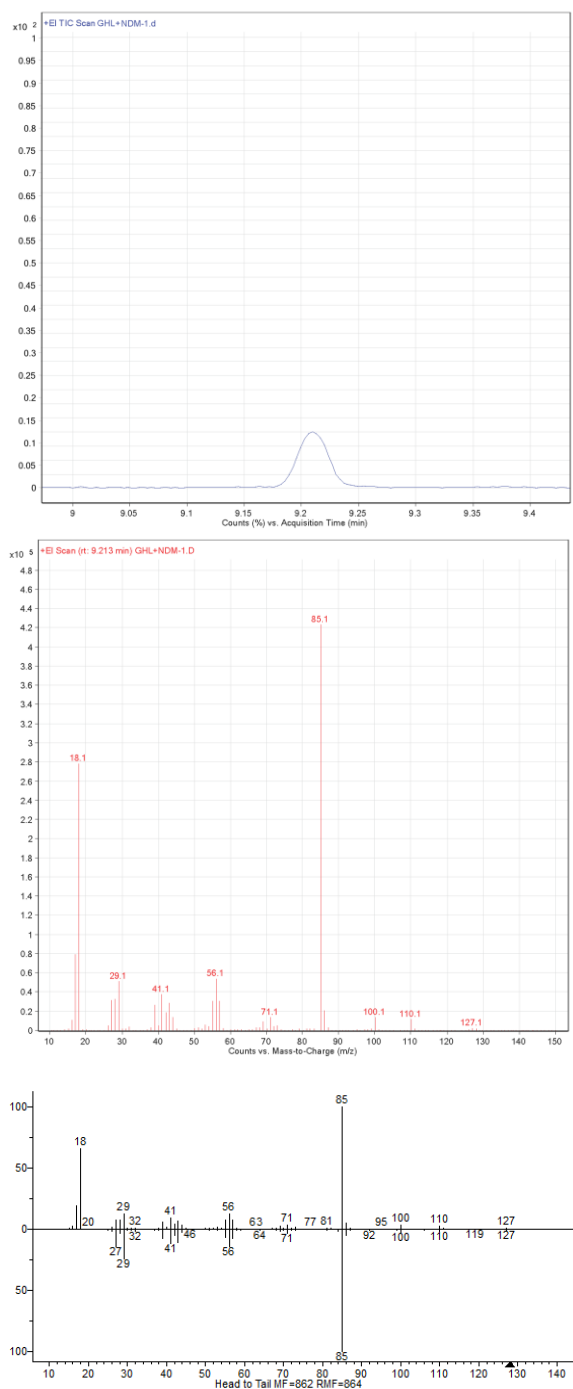

D

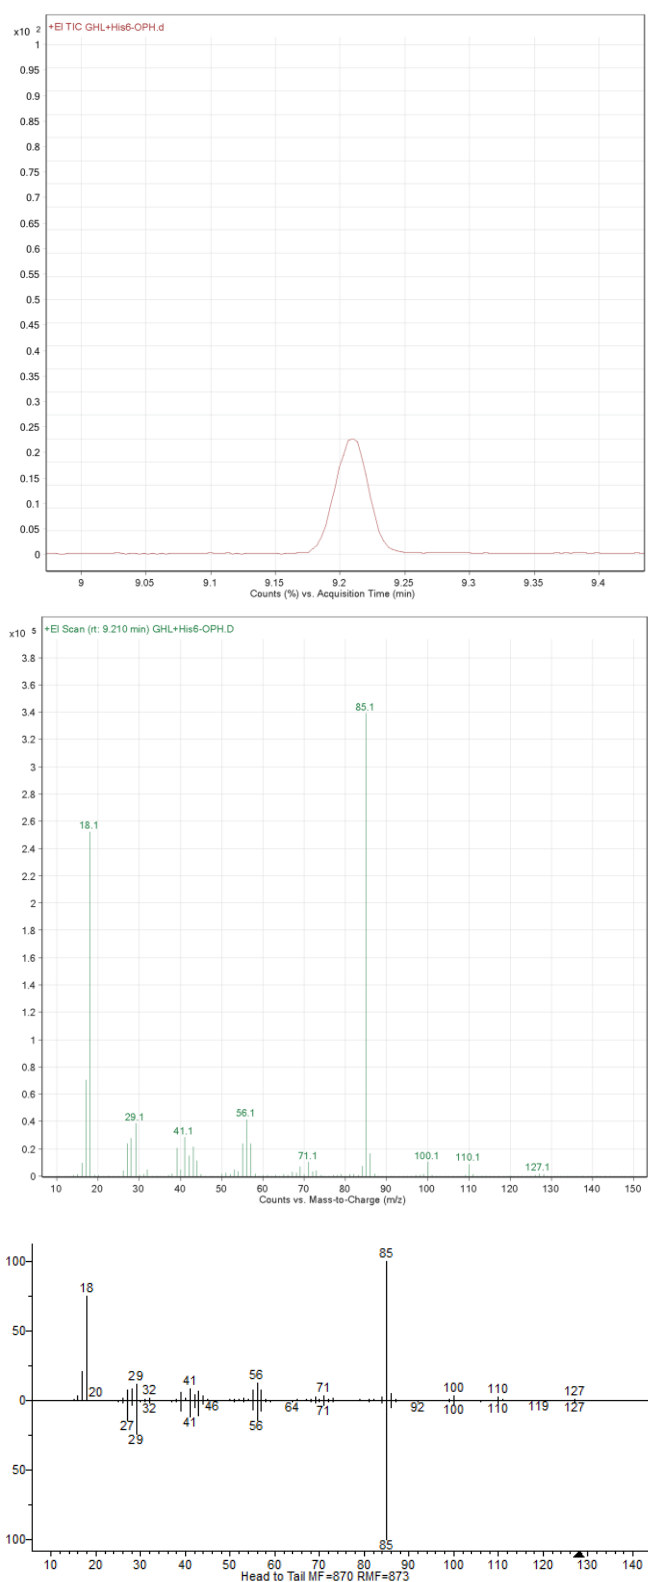

**Figure S13.** GC/MS analysis of  $\gamma$ -heptalactone (GHL) (A) after treatment with enzymes: AiiA (B), NDM-1 (C) His<sub>6</sub>-OPH (D). The mass spectra of  $\gamma$ -heptalactone samples peak (top mass spectra) and the mass spectra of  $\gamma$ -heptalactone from the NIST MS library (bottom mass spectra) is also shown. The mass of  $\gamma$ -heptalactone calculated using ChemDraw software and obtained was 128.08 Da and 128.17 Da, respectively.

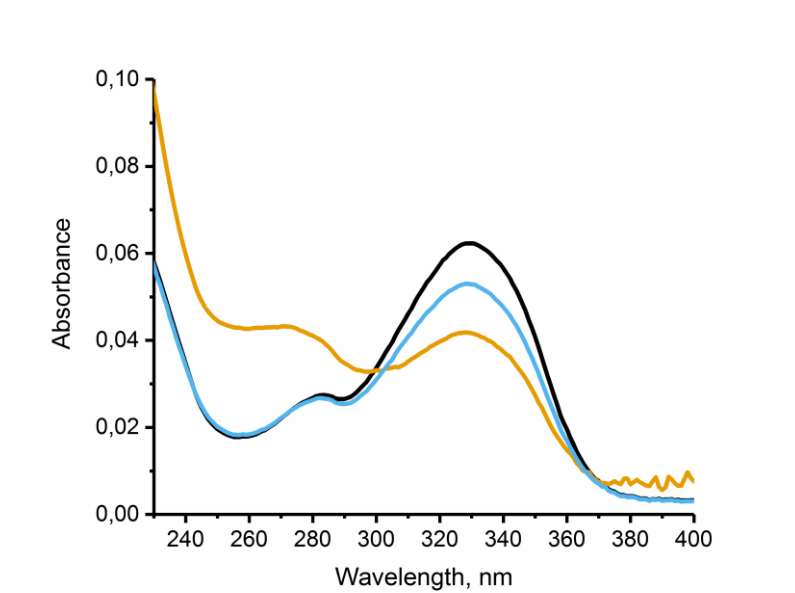

**Figure S14.** The absorption spectra of butyrolactone I at the initial time (0 h, **black line**) and after 24 h of exposure to natural light in the absence (**blue line**) and the presence (**orange line**) of His<sub>6</sub>-OPH.
